1

2

3 Running title: Urban colonization traits

4 **Urban colonization is driven by a mixture of evolutionarily conserved and**  
5 **labile traits**

6 David A. Duchene<sup>1\*</sup>, Carolina Pardo-Diaz<sup>2</sup>, Maider Iglesias-Carrasco<sup>1</sup>

7

8 <sup>a</sup>*Research School of Biology, Australian National University, ACT 2601, Australia*

9 <sup>b</sup>*Biology Program, Universidad del Rosario, Carrera 24 No.63C-69, Bogotá, 111221*

10 *Colombia*

11

12 \*Corresponding author

13 David A. Duchêne

14 Research School of Biology

15 Robertson Building, 46

16 Australian National University

17 Canberra, ACT 2601

18 Australia

19 Telephone: +61 4 12026379

20 Email: david.duchene@anu.edu.au

21

22 **Abstract**

23

24 Urbanization is a fast and dramatic transformation of habitat that generally forces native  
25 fauna into novel ecological challenges. The biological prerequisites necessary to establish in  
26 urban areas have been widely studied, but the macroevolutionary characteristics of traits that  
27 allow urban colonization remain poorly understood. Urban colonization might be facilitated  
28 by traits that are evolutionarily conserved and which lead to a diversity of closely related  
29 species. Alternatively, urban colonization might be associated with labile traits that  
30 frequently arise and are lost. In a large data set from passerine birds, we find that urban  
31 colonization has a signal of highly labile traits, despite many traits associated with  
32 colonization being highly conserved. Urban colonization is associated with traits that allow  
33 faster speciation than non-urban-colonizing counterparts, and more frequently transition to  
34 non-urban trait states than in the opposite direction. Overall, the traits that facilitate urban  
35 colonization are a mix of highly conserved and labile traits and appear to provide an  
36 evolutionarily successful strategy.

37

38

39 **Keywords:** body mass, brain size, anthropic habitats, evolutionary distinctiveness,  
40 urbanization.

## 41 **Introduction**

42

43 Urbanization is one of the most rapid anthropogenic changes to the environment, and can  
44 have a dramatic impact on local communities [1,2]. While urbanization is often associated  
45 with a loss of biodiversity and of evolutionary distinctiveness [3], a broad range of species  
46 have successfully established in these novel environments. Understanding the biological traits  
47 that allow urban colonization can be important for predicting the impact of urbanization on  
48 biodiversity. In birds, there are several biological predictors of successful urban colonization  
49 including lack of plumage dichromatism, large body mass, large brain size, migration ability  
50 and broad environmental tolerance [4–8]. Such a collection of traits might impact species  
51 survival, leaving a mark across deep evolutionary timescales [9,10]. However, the  
52 macroevolutionary trajectory of the complete set of traits in urban-colonizing species remains  
53 poorly understood.

54 The macroevolution of traits that facilitate urban colonization is driven primarily by  
55 three processes: speciation, extinction, and the transition among species that do not have such  
56 traits and those that do. In consequence, the distribution of urban colonizing species in a  
57 phylogeny will depend on the rate of each of these processes. One possible scenario is that  
58 the transition between traits that do not allow urban colonization and those that do is  
59 infrequent in either direction. In such cases, the traits that allow colonization might only  
60 occur among closely related species and will be clustered across the phylogeny. Any  
61 differences in the current diversity of the urban colonizers versus non-colonizers is then  
62 driven by differences in rates of speciation and extinction, and not by the rate of appearance  
63 and disappearance of traits. In birds, however, urban colonizers come from a broad range of  
64 taxa, suggesting that the rate of transition between traits is actually high [3,11].

65 In another scenario, species might frequently transition between having traits that  
66 facilitate urban colonization and those that do not. The speciation and extinction rates of  
67 urban colonizers might be similar to those of non-colonizers, but the traits that allow  
68 colonization might be frequently gained and lost. If urban colonization is driven by such  
69 evolutionarily labile traits, colonizers and non-colonizers will be highly dispersed across their  
70 phylogeny. However, there is also evidence against this hypothesis, since many of the traits  
71 associated with urban colonization are conserved, such as brain size [11].

72 Alternatively, urban-colonizers and non-colonizers might differ in rates of both  
73 diversification (speciation and extinction) and transition. In this case, colonizers and non-  
74 colonizers might differ in their pattern of phylogenetic clustering, and several combinations  
75 of rates of speciation, extinction and transition can lead to such an observation. One  
76 interesting case occurs when transition is high in a single direction (e.g., non-urban colonizer  
77 traits to urban-colonizer traits), and the frequently-emerging traits cause an increased rate of  
78 extinction by benefitting individuals at the expense of the population. This phenomenon has  
79 been termed “evolutionary suicide” [12,13]. Examples of traits that have been proposed to  
80 emerge often but reduce the evolutionary success of species include self-compatibility in  
81 plants [14] or some forms of specialization [15]. The traits that allow urban colonization  
82 might be such an evolutionary “dead-end”, if urban colonization increases the already-high  
83 chances of extinction in those species. This hypothesis might explain the loss of evolutionary  
84 distinctiveness in urban areas [2] and the lack of phylogenetic clustering in urban colonizers

85 [3], and should appear as a highly dispersed or “tippy” pattern of urban colonizers in their  
86 phylogeny [16].

87       Apart from the main three scenarios explained so far, there are other combinations of  
88 rates of speciation, extinction, and transition that might govern the macroevolution of current  
89 urban-colonizers and non-colonizers. Therefore, to test the pattern associated with urban  
90 colonization and whether it is driven by traits that are evolutionarily successful or  
91 detrimental, and either conserved or labile, we analyzed published data from passerine birds.  
92 We first tested whether urban colonization and three traits previously associated with urban  
93 colonization (brain size, body mass, and plumage dichromatism) are phylogenetically  
94 dispersed within the passerines. We then used maximum likelihood and simulation  
95 approaches to test whether the collection of traits that might have allowed colonization of  
96 urban areas are either evolutionarily conserved, or tend to be either labile or even suicidal at a  
97 macroevolutionary scale.

98

## 99 **Methods**

100

101       To gain insight into the types of traits that allow urban colonization, we examined the  
102 macroevolutionary features of the species that have successfully colonized urban areas. We  
103 gathered information about urban presence/absence [17] of passerine birds, and three traits of  
104 species associated with the colonization and establishment of passerines in urban areas: brain  
105 size ([4,18], but see [11,19]), body mass [5,8] and plumage dichromatism [8] (see  
106 Supplementary Information for data collection).

107       We first tested whether brain size, body mass, plumage dichromatism and urban  
108 colonization of the set of species for which the latter variable was available are either  
109 taxonomically grouped or randomly dispersed across their phylogeny. Previous studies have  
110 already explored the phylogenetic characteristics of brain size, body mass, plumage  
111 dichromatism in datasets including large samples of the extant passerine species (e.g., [20]).  
112 To explore whether similar patterns are seen only for the set of species for which there are  
113 data on presence/absence in urban areas, we ran these analyses on the reduced data set for  
114 which all variables were available (brain size,  $n = 251$ ; body mass,  $n = 506$ ; plumage  
115 dichromatism,  $n = 506$ ).

116       We first estimated the maximum clade credibility (MCC) phylogenetic tree of a  
117 random sample of 1000 time-calibrated trees containing every species of birds [21]. The  
118 complete MCC tree was pruned to contain the 506 species of passerine birds for which the  
119 other data were available (or 251 species for the dataset in brain size), and was then used for  
120 subsequent analyses. We tested whether urban habitat colonization is either significantly  
121 phylogenetically clustered or over-dispersed by calculating Fritz and Purvis’  $D$  statistic [22]  
122 and comparing that value to 1000 simulations under each of the two null models, using the R  
123 package *caper* [23]. Similarly, we tested the hypotheses that the variables of brain size, body  
124 mass and plumage dichromatism have phylogenetic signal by testing the significance of  
125 Pagel’s  $\lambda$  [24] as implemented in the R package *phytools* [25].

126       To assess whether traits that allow urban colonization are highly labile or even  
127 suicidal, we performed two tests of the macroevolution of successfully colonizing species  
128 (see [16] for full details on this method): (i) we tested whether colonizing species have had a

129 greater number of evolutionary origins (*NoTO*), and (ii) whether they have a lower number of  
130 also-colonizing sister species (*SSCD*) than expected under a null process in which rates of  
131 gain and loss of a trait are equal in both directions (as proposed in [16]), using the R package  
132 *phylogenetics* [26]. Traits that are likely to be significantly labile or suicidal have values of  
133 these metrics that are significantly different from the null, and also have a *D* statistic of  
134 phylogenetic clustering indicating a significantly dispersed phylogenetic distribution [16].  
135 We performed these analyses assuming that we have an incomplete sample from the  
136 passerines ( $506 / 5966 = 0.085$ ).

137 We examined whether the data contained a signal of significant differences in rates of  
138 speciation, extinction, or transition between colonizing and non-colonizing species by testing  
139 models of binary state-speciation and extinction (BiSSE; [27,28]). The diversification rates in  
140 passerine birds are likely to be affected by many factors that are not considered in this study  
141 (e.g., [29]). Therefore, we restricted our analyses to testing whether the distinction between  
142 colonizers and non-colonizers is superior to more simple models where the distinction is not  
143 present. If the primary drivers of diversification rates in passerines are entirely unrelated with  
144 the traits associated with urban colonization, the distinction between colonizers and non-  
145 colonizers will not be meaningful and lead to similar fit in models of diversification.

146 We tested whether a model in which colonizing and non-colonizing species have  
147 different rates of speciation, extinction, and transition (hereafter “full model”), was superior  
148 to four alternative models in which colonizing and non-colonizing species have (i) identical  
149 speciation rates, (ii) identical extinction rates, (iii) identical transition rates, or (iv) equivalent  
150 values for each of these traits across the two groups. The models were corrected for  
151 incomplete taxon sampling and likelihood ratio tests were performed comparing the full  
152 model and each of these alternative hypotheses. Results were corrected for multiple tests  
153 using false discovery rates.

154

## 155 **Results**

156

157 We found that in passerine birds there is significant phylogenetic signal in plumage  
158 dichromatism ( $\lambda = 0.78, p < 0.001$ ), brain size ( $\lambda = 0.88, p < 0.001$ ), and body mass ( $\lambda = 0.88,$   
159  $p < 0.001$ ). Meanwhile, colonization of urban areas is significantly more phylogenetically  
160 dispersed than a pattern emerging from Brownian motion. However, it is also significantly  
161 more clustered than a random assortment of species across the phylogeny of passerine birds  
162 ( $D = 0.695, p < 0.001$ ; Fig. 1). Nonetheless, we find that evolutionary factors associated with  
163 urban colonization lead to a greater number of evolutionary origins, and a smaller number of  
164 also-colonizing sister taxa than expected under a Brownian motion evolutionary process  
165 ( $NoTO = 3.35, p < 0.001$ ;  $SSCD = 193.21, p < 0.001$ ).

166 Tests of BiSSE models showed that the full model, which makes a distinction  
167 between urban colonising species and non-colonizers, provided a significantly better fit than  
168 models that did not make a distinction between the two groups in terms of their speciation  
169 rates ( $p < 0.001$ ), rates of transition ( $p = 0.003$ ), or in all of speciation, extinction, and  
170 transition rates ( $p < 0.001$ ; Fig. 1; Table S1). However, the full model was not significantly  
171 superior to a model in which the two groups share an identical extinction rate ( $p = 0.099$ ;  $\varepsilon =$   
172  $0.146$ ). In the full model and the more simple model where extinction rates are identical,

173 speciation rates were estimated to be greater in urban colonizing species ( $\lambda_U = 0.412$ ) than in  
174 non-colonizing species ( $\lambda_N = 0.149$ ), and the estimated rate of transitions between states was  
175 estimated to be greater in the direction from colonizing species to non-colonizers ( $q_{UN} =$   
176  $0.158$ ) than the opposite ( $q_{NU} = 0.023$ ).

177

178 **Figure 1.** Fritz and Purvis'  $D$  statistic of phylogenetic clustering for urban colonization  
179 (black vertical arrow) as a proxy of the traits that allow this phenomenon. Expected  
180 distributions shown are drawn from simulations of the data under an evolutionary processes  
181 of Brownian motion (blue) and random change (red). We describe some of the factors that  
182 might cause an increase in phylogenetic dispersal versus clustering of traits associated with  
183 urban colonization.

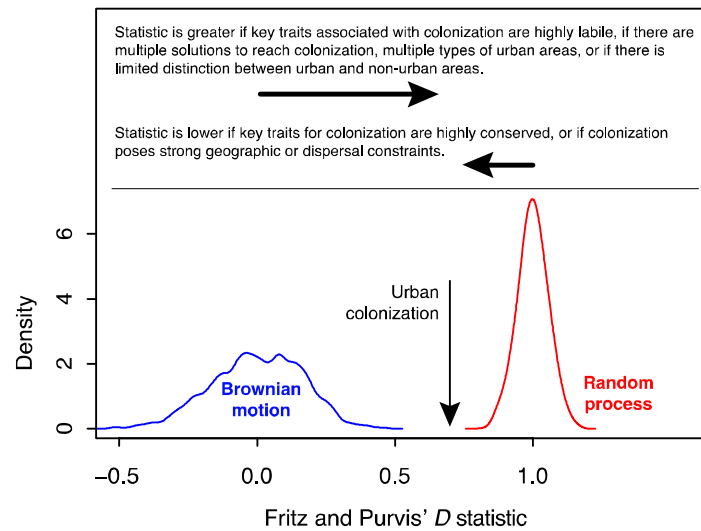

184

185

186

187 **Figure 2.** Phylogenetic tree of the passerine species sampled showing the positioning of  
188 urban colonizers (red) and non-urban colonizers (black). Internal nodels and the statistics  
189 shown are drawn from the maximum likelihood estimate of the ancestral states under the  
190 BiSSE model. The estimates shown are not intended to represent the model that best  
191 describes the processes the drove the diversification of passerine birds.  
192

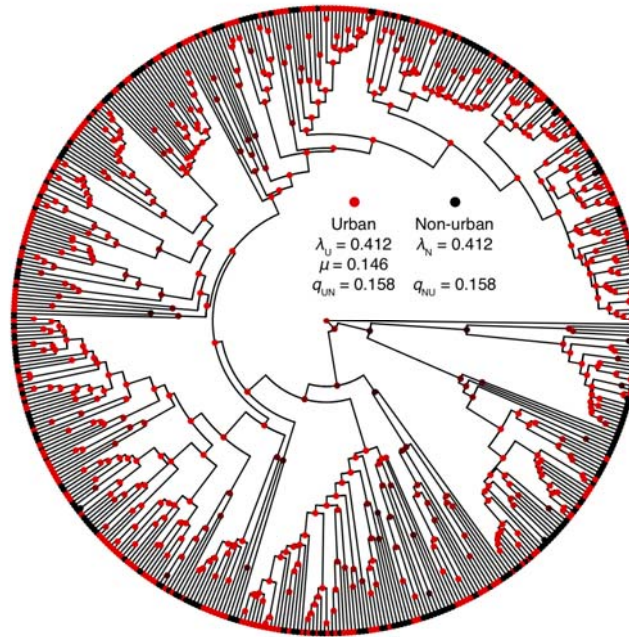

193  
194  
195  
196

## Discussion

197 Some collections of traits can influence the chances of species success or demise, so the  
198 macroevolutionary history of different groups of traits have been a longstanding matter of  
199 interest (e.g., [10,22]). Our data show that rates of transition and speciation might be uneven  
200 while extinction rates are similar. This suggests that many of the traits that are associated  
201 with urban colonization of species of passerine birds are evolutionarily conserved. However,  
202 urban colonizers are not significantly grouped phylogenetically in passerine birds, suggesting  
203 that urban colonization is not driven by purely conserved or labile traits. Some of the traits  
204 that allow urban colonization are likely to be labile and have frequently been lost in the  
205 evolution of passerines. Interestingly, the complete collection of traits has provided a  
206 comparatively successful strategy over the traits that occur in non-urban species. Therefore,  
207 our data suggest that urban areas are not a sink of biodiversity that accelerates the demise of  
208 species with already unfortunate macroevolutionary trajectories.

209 Some of the traits explored here might have direct effects on the elevated rate of  
210 speciation in urban-colonizing species. However, this effect occurs in the opposite direction  
211 as might be expected, because urban species tend to have large body size and have lower  
212 amounts of sexual selection [8], both of which are associated with slower rates of  
213 diversification [20,30]. Instead, other features of urban colonizers might have been associated  
214 with their relatively high speciation rates. One example is being a dietary generalist, which is

215 strongly associated with diversification rates in birds [20] and is a distinctive feature of urban  
216 colonizers [11].

217 Urban colonizers are associated with relatively fast speciation rates and frequent  
218 transition towards a different combination of traits. Some successful evolutionary strategies  
219 can frequently breakdown and lead to novel diversity. Examples include the common switch  
220 from self-incompatibility to the less-successful self-compatibility strategy in the plant family  
221 Solanaceae [14], or the frequent switch from bisexuality to the less-successful unisexuality in  
222 liverworts [31]. Similarly, generalist taxa sometimes have faster rates of diversification and  
223 greater rates of transition to specialization than the opposite direction [15]. In addition to  
224 being dietary generalists, urban-colonizing species have been proposed to have broad  
225 environmental tolerances [7] and high behavioural flexibility ([4,32] but see [11,19]), which  
226 are likely easily lost evolutionarily, yet might provide species with resilience and long term  
227 evolutionary success.

228 Our results suggest that urban areas attract species with traits that are robust in  
229 macroevolutionary terms, such that cities might serve as a reservoir of biodiversity [33,34].  
230 This is consistent with the lack of evidence for poor health in urban taxa [35–37] and the fact  
231 that urban species are often in the process of becoming reproductively isolated from non-  
232 urban counterparts [33]. The high rate of transition out of the traits that allow urban  
233 colonization means that novel diversity arising from urban areas might contain non-urban  
234 traits (e.g., strong sexual selection, small body size, specialization). Understanding the  
235 medium- and long-term evolutionary trajectories of urban species might aid urban planning  
236 in the future, since the predicted increase in urbanization might impact species without  
237 suitable traits (e.g., specialist species).

238 While urban areas are associated with the homogenization of biodiversity and the loss  
239 of evolutionary distinctiveness, the traits that allow for colonization of these areas do not  
240 appear to cause increased extinction rates at a macroevolutionary scale. Since urban  
241 colonization is not phylogenetically clustered, it is also likely to be driven by highly labile  
242 and common traits. Labile traits that are most likely to contribute to urban colonization might  
243 include nesting location [5] or song type [38], while other conserved traits might include  
244 feeding habits or brain size [4]. Exploring the macroevolution of traits further on species  
245 colonization of novel habitats is likely to bring important insights into species sensitivity to  
246 future urbanization.

247

#### 248 **Author contributions**

249

250 DAD, MIC, and CPD conceived the idea, MIC and CPD collected the data, DAD analysed  
251 the data, all the authors interpreted the results and helped drafting the manuscript.

252

#### 253 **Funding**

254

255 This work was supported by funding from the Australian Research Council to D.A.D. (grant  
256 DE190100544).

257

#### 258 **Conflict of interest**

259

260 The authors declare no conflict of interest

261

## 262 **Ethics**

263

264 Not applicable

265

## 266 **Data accessibility**

267

268 The data used in this project are available at [github.com/duchene/urbanSexSel](https://github.com/duchene/urbanSexSel).

269

## 270 **References**

271

- 272 1. McKinney ML. 2002 Urbanization, biodiversity, and conservation. *Bioscience* **52**, 883.
- 273 2. Ibáñez-Álamo J, Rubio E, Benedetti Y, Morelli F. 2017 Global loss of avian  
274 evolutionary uniqueness in urban areas. *Glob. Chang. Biol.* **23**, 2990–2998.
- 275 3. Sol D, Bartomeus I, González-Lagos C, Pavoine S. 2017 Urbanisation and the loss of  
276 phylogenetic diversity in birds. *Ecol. Lett.* **20**, 721–729.
- 277 4. Maklakov A, Immler S, Gonzalez-voyer A, Rönn J, Kolm N. 2011 Brains and the city:  
278 big-brained passerine birds succeed in urban environments. *Biol. Lett.* **7**, 730–732.
- 279 5. Croci S, Butet A, Clergeau P. 2008 Does urbanization filter birds on the basis of their  
280 biological traits? *Condor* **110**, 223–240.
- 281 6. Lowry H, Lill A, Wong BBM. 2013 Behavioural responses of wildlife to urban  
282 environments. *Biol. Rev.* **88**, 537–549.
- 283 7. Bonier F, Martin PR, Wingfield JC. 2007 Urban birds have broader environmental  
284 tolerance. *Biol. Lett.* **3**, 670–673.
- 285 8. Iglesias-Carrasco M, Duchêne DA, Head ML, Møller AP, Cain K. 2019 Sex in the  
286 city: sexual selection and urban colonization in passerines. *Biol. Lett.* **15**, 20190257.
- 287 9. Bennett PM, Owens IPF. 1997 Variation in extinction risk among birds: Chance or  
288 evolutionary predisposition? *Proc. R. Soc. B Biol. Sci.* **264**, 401–408.
- 289 10. Cardillo M, Mace GM, Jones KE, Bielby J, Bininda-Emonds ORP, Sechrest W, Orme  
290 CDL, Purvis A. 2005 Multiple causes of high extinction risk in large mammal species.  
291 *Science* **309**, 1239–1241.
- 292 11. Evans KL, Chamberlain DE, Hatchwell BJ, Gregory RD, Gaston KJ. 2011 What  
293 makes an urban bird? *Glob. Chang. Biol.* **17**, 32–44.
- 294 12. Kokko H, Heubel KU. 2011 Prudent males, group adaptation, and the tragedy of the  
295 commons. *Oikos* **120**, 641–656.
- 296 13. Gyllenberg M, Parvinen K. 2001 Necessary and sufficient conditions for evolutionary  
297 suicide. *Bull. Math. Biol.* **63**, 981–993.
- 298 14. Goldberg EE, Kohn JR, Lande R, Robertson KA, Smith SA, Igić B. 2010 Species  
299 selection maintains self-incompatibility. *Science* **330**, 493–495.
- 300 15. Day EH, Hua X, Bromham L. 2016 Is specialization an evolutionary dead end?  
301 Testing for differences in speciation, extinction and trait transition rates across diverse  
302 phylogenies of specialists and generalists. *J. Evol. Biol.* **29**, 1257–1267.
- 303 16. Bromham L, Hua X, Cardillo M. 2016 Detecting macroevolutionary self-destruction  
304 from phylogenies. *Syst. Biol.* **65**, 109–127.
- 305 17. Ibáñez-Álamo J, Rubio E, Bitrus Zira K. 2017 The degree of urbanization of a species  
306 affects how intensively it is studied: a global perspective. *Front. Ecol. Evol.* **5**, 41.



- 307 18. Sol D, Duncan RP, Blackburn TM, Cassey P, Lefebvre L. 2005 Big brains, enhanced  
308 cognition, and response of birds to novel environments. *Proc. Natl. Acad. Sci. U. S. A.*  
309 **102**, 5460–5465.
- 310 19. Møller AP, Erritzøe J. 2015 Brain size and urbanization in birds. *Avian Res.* **6**, 1–7.
- 311 20. Phillimore AB, Freckleton RP, Orme CDL, Owens IPF. 2006 Ecology predicts large-  
312 scale patterns of phylogenetic diversification in birds. *Am. Nat.* **168**, 220–229.
- 313 21. Jetz W, Thomas GH, Joy JB, Hartmann K, Mooers AO. 2012 The global diversity of  
314 birds in space and time. *Nature* **491**, 444–448.
- 315 22. Fritz SA, Purvis A. 2010 Selectivity in mammalian extinction risk and threat types: a  
316 new measure of phylogenetic signal strength in binary traits. *Conserv. Biol.* **24**, 1042–  
317 51.
- 318 23. Orme D, Freckleton R, Thomas G, Petzoldt T, Fritz S, Isaac N, Pearse W. 2018 caper:  
319 comparative analyses of phylogenetics and evolution in R. R package version 1.0.1.
- 320 24. Pagel M. 1999 Inferring the historical patterns of biological evolution. *Nature* **401**,  
321 877–884.
- 322 25. Revell LJ. 2012 phytools: an R package for phylogenetic comparative biology (and  
323 other things). *Methods Ecol. Evol.* **3**, 217–223.
- 324 26. Hua X, Bromham L. 2016 PHYLOMETRICS: an R package for detecting  
325 macroevolutionary patterns, using phylogenetic metrics and backward tree simulation.  
326 *Methods Ecol. Evol.* **7**, 806–810.
- 327 27. Maddison WP, Midford PE, Otto SP. 2007 Estimating a binary character’s effect on  
328 speciation and extinction. *Syst. Biol.* **56**, 701–710.
- 329 28. FitzJohn RG, Maddison WP, Otto SP. 2009 Estimating trait-dependent speciation and  
330 extinction rates from incompletely resolved phylogenies. *Syst. Biol.* **58**, 595–611.
- 331 29. Claramunt S, Derryberry EP, Remsen J V., Brumfield RT. 2012 High dispersal ability  
332 inhibits speciation in a continental radiation of passerine birds. *Proc. R. Soc. B Biol.*  
333 *Sci.* **279**, 1567–1574.
- 334 30. Iglesias-Carrasco M, Jennions MD, Ho SYW, Duchêne DA. 2019 Sexual selection,  
335 body mass and molecular evolution interact to predict diversification in birds. *Proc. R.*  
336 *Soc. B Biol. Sci.* **286**, 20190172.
- 337 31. Laenen B *et al.* 2016 Increased diversification rates follow shifts to bisexuality in  
338 liverworts. *New Phytol.* **210**, 1121–1129.
- 339 32. Sol D, Timmermans S, Lefebvre L. 2002 Behavioural flexibility and invasion success  
340 in birds. *Anim. Behav.* **63**, 495–502.
- 341 33. Thompson KA, Rieseberg LH, Schluter D. 2018 Speciation and the City. *Trends Ecol.*  
342 *Evol.* **33**, 815–826.
- 343 34. Zuñiga-Palacios J, Zuria I, Moreno CE, Almazán-Núñez RC, González-Ledesma M.  
344 2020 Can small vacant lots become important reservoirs for birds in urban areas? A  
345 case study for a Latin American city. *Urban For. Urban Green.* **47**, 126551.
- 346 35. Lyons J, Mastromonaco G, Edwards DB, Schulte-Hostedde AI. 2017 Fat and happy in  
347 the city: Eastern chipmunks in urban environments. *Behav. Ecol.* **28**, 1464–1471.
- 348 36. Bókony V, Seress G, Nagy S, Lendvai Ádám Z, Liker A. 2012 Multiple indices of  
349 body condition reveal no negative effect of urbanization in adult house sparrows.  
350 *Landsc. Urban Plan.* **104**, 75–84.
- 351 37. Iglesias-Carrasco M, Martín J, Cabido C. 2017 Urban habitats can affect body size and  
352 body condition but not immune response in amphibians. *Urban Ecosyst.* **20**, 1331–  
353 1338.
- 354 38. Slabbekoorn H, den Boer-Visser A. 2006 Cities change the songs of birds. *Curr. Biol.*  
355 **16**, 2326–2331.
- 356
